# Supplementary material
Source: PubMed Central journal article supplement (PMC1464565)
Supplement: jphysiol_2004.081299_1.pdf [file jphysiol_2004.081299_1.pdf]

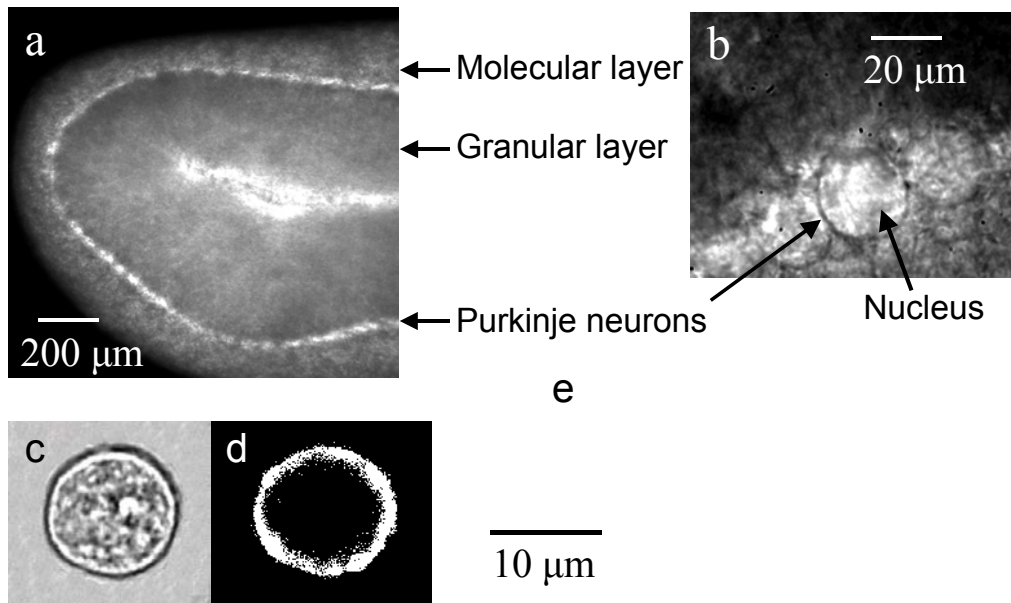

**Fig. 1. Nuclei were isolated from thin slices of cerebellar cortex.**

a and b, images of a sagittal slice of cerebellar cortex used for isolation of Purkinje and granule neuron nuclei.

c, a laser scanning microscope image of a nucleus isolated from a Purkinje neuron.

d, a fluorescent image of the same nucleus loaded with fluo-3.

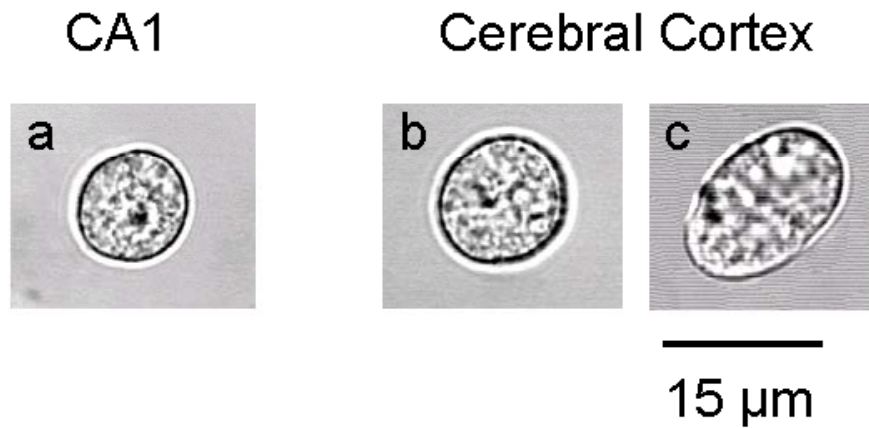

**Fig. 2. Methods developed in this paper can be used for isolating nuclei from any type of central neurons.**

**a**, a nucleus isolated from a hippocampal CA1 pyramidal neuron.

**b** and **c**, two nuclei isolated from pyramidal neurons of rat cerebral cortex.

All images were obtained from unstained live nuclei with a laser scanning microscope.

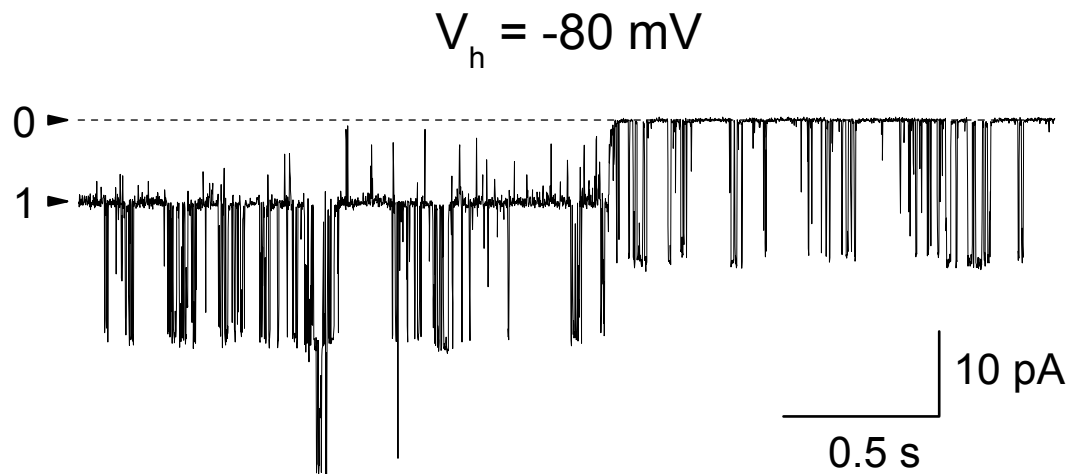

**Fig. 3. Large-conductance cationic and  $\text{InsP}_3$ -activated channels coexist in the inner nuclear membrane of Purkinje neurons.**

The dotted line shows the zero current level. At the beginning of the trace the large-conductance cationic channel is open. The arrowheads indicate the levels of closed (0) and open (1) states of the channel.  $\text{InsP}_3$ -activated channel activity is seen as short-lasting downward deflections from the zero-current level or is superimposed on the cationic channel current.

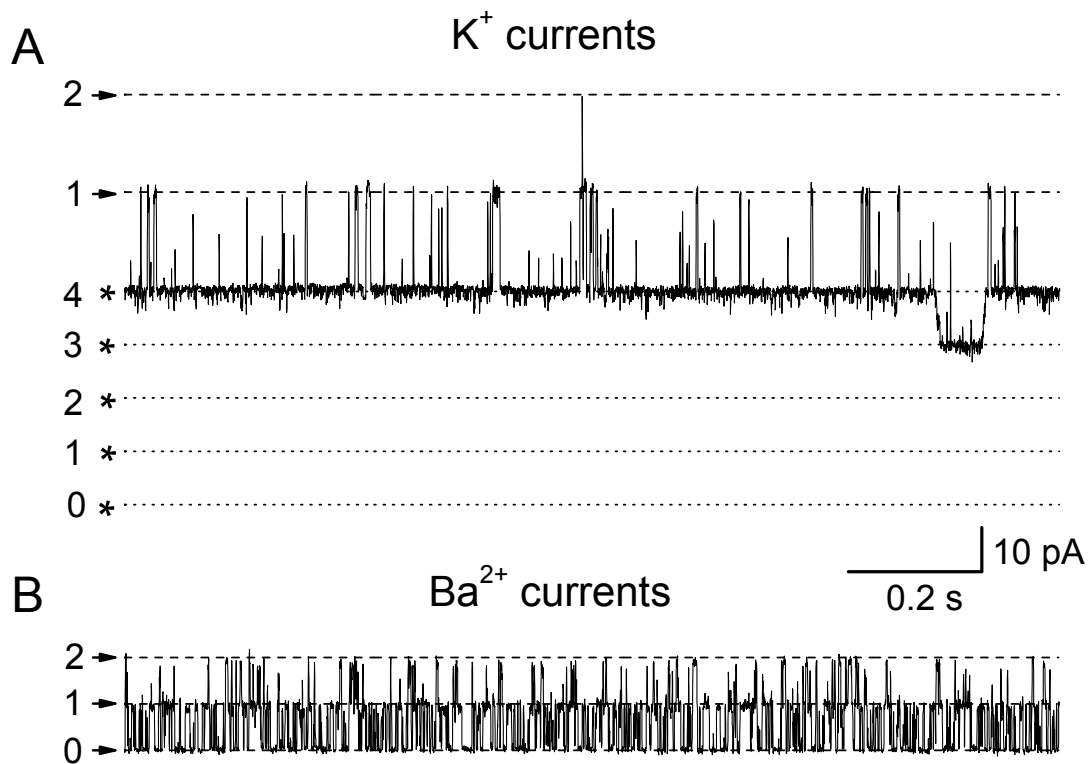

**Fig. 4. Open probability of InsP<sub>3</sub>-activated channels depended on ion species carrying current through the channel.**

Two patches of the inner nuclear membrane both containing two InsP<sub>3</sub>Rs.

When the current was carried by K<sup>+</sup> (A) open probability of InsP<sub>3</sub>-activated channels was much lower than it was carried by Ba<sup>2+</sup> (B; P<sub>o</sub>= 0.036 and 0.32 respectively). In A the patch contained four large-conductance cationic channels (their current levels shown by dotted lines and asterisks) superimposed on InsP<sub>3</sub>R activity (indicated by dashed lines and arrows). In A and B the patch pipettes were filled with respectively KCl and BaCl<sub>2</sub> solutions, in both experiments bath solution contained KCl solution containing 2 μM InsP<sub>3</sub>, 0.5 mM ATP and 250 nM free Ca<sup>2+</sup>. Holding potential was 60 mV.

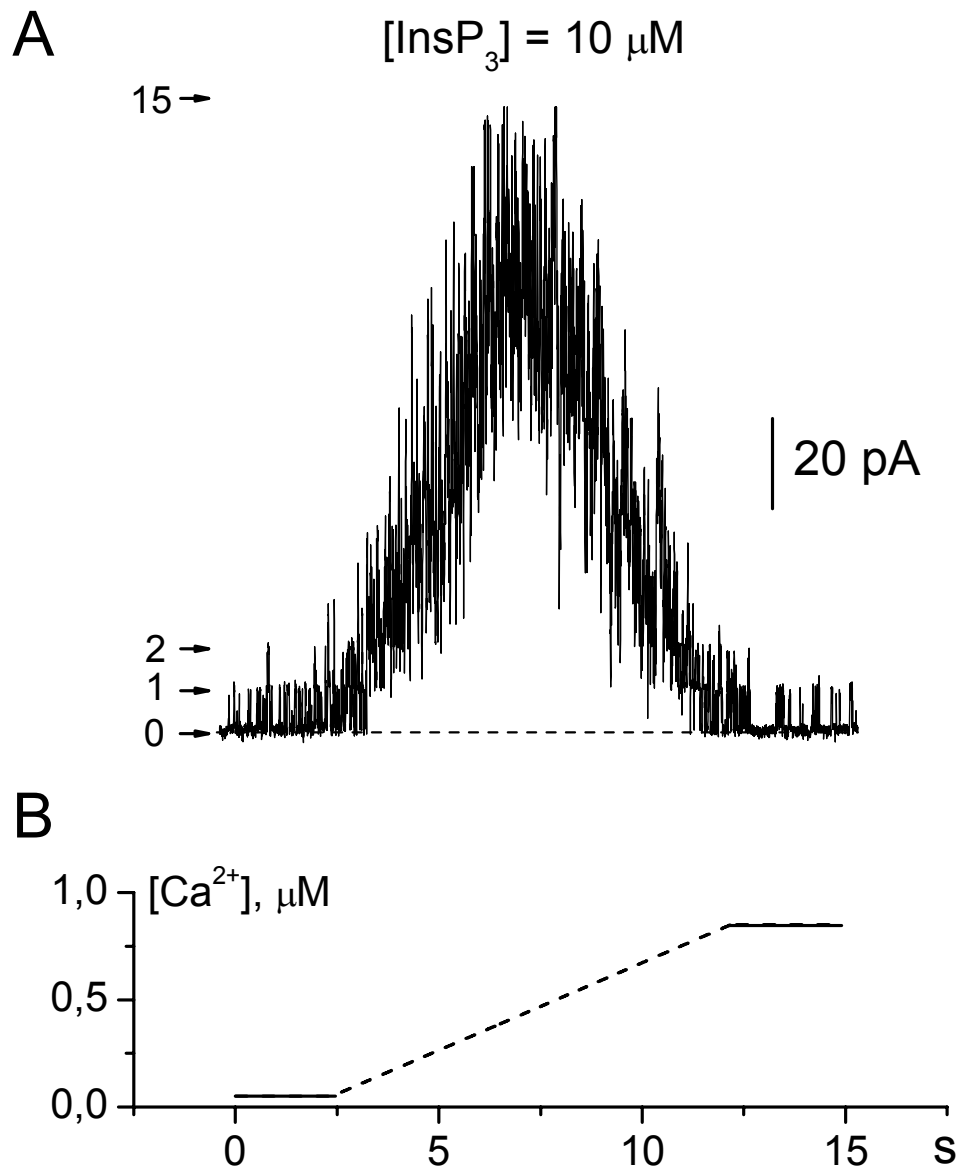

**Fig. 5. Biphasic regulation of  $\text{InsP}_3\text{Rs}$  in the inner nuclear membrane of Purkinje neurons by  $\text{Ca}^{2+}$ .**

A, at the beginning of the record bath was filled with KCl solution containing 50 nM free  $\text{Ca}^{2+}$  which was gradually substituted with solution with higher  $\text{Ca}^{2+}$  concentration (B) so that in the end of the record  $[\text{Ca}^{2+}]_i$  was 850 nM. The number of simultaneously open  $\text{InsP}_3$ -activated channels indicated by figures near arrows on the left. Concentrations of all other components remained unchanged throughout experiment –  $\text{InsP}_3$ , 10  $\mu\text{M}$ ; ATP, 0.5 mM. The rise in  $[\text{Ca}^{2+}]_i$  was not strictly linear and is roughly shown in B by a dashed line.
